# Supplementary material for: Multi-functional photoelectric sensors based on a series of isopolymolybdate-based compounds for detecting different ions
Source: Royal Society of Chemistry journal article supplement (doi:10.1039/d0qi00505c), 2020-01-01
Supplement: d0qi00505c1.pdf [file d0qi00505c1.pdf]

Electronic Supplementary Material (ESI) for Inorganic Chemistry Frontiers.  
This journal is © The Partner Organisations 2020

## Multi-functional Photoelectric Sensors based on A series of Isopolymolybdate-based Compounds for Detecting Different Ions

Chen Wang, Jun Ying\*, Hai-chen Mou, Ai-xiang Tian, Xiu-li Wang\*

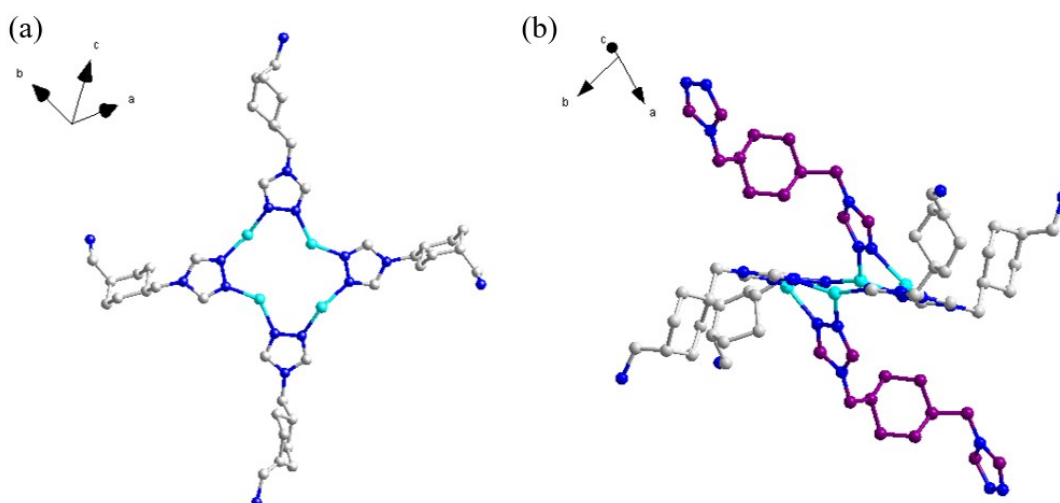

**Fig. S1.** (a) The tetranuclear copper cluster in compound **1** constructed by four ctm molecules. (b) Two btmc ligands linking a tetranuclear copper cluster by Cu-N bonds.

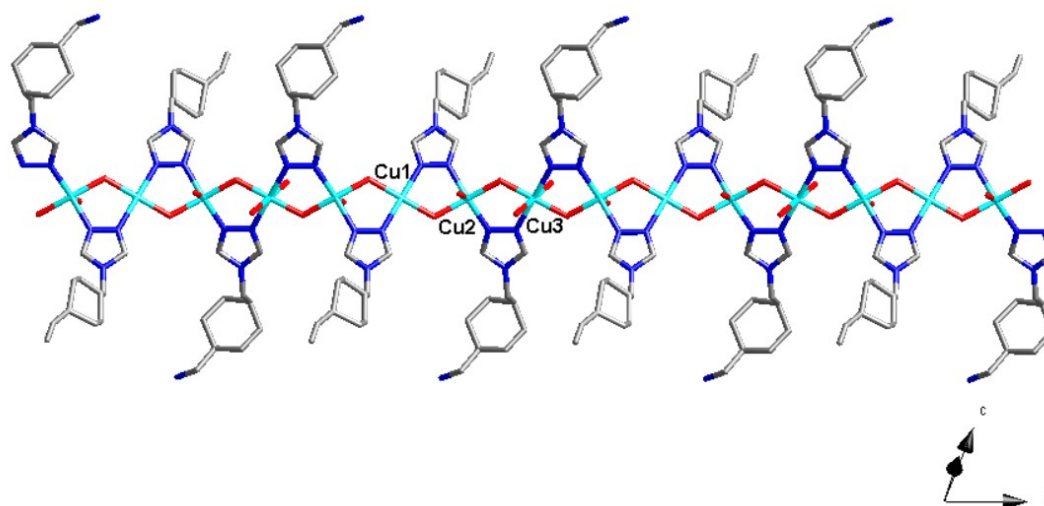

**Fig. S2.** The 1D metal-organic chain of compound **2** with ligands mct and ctm in the form of AABB.

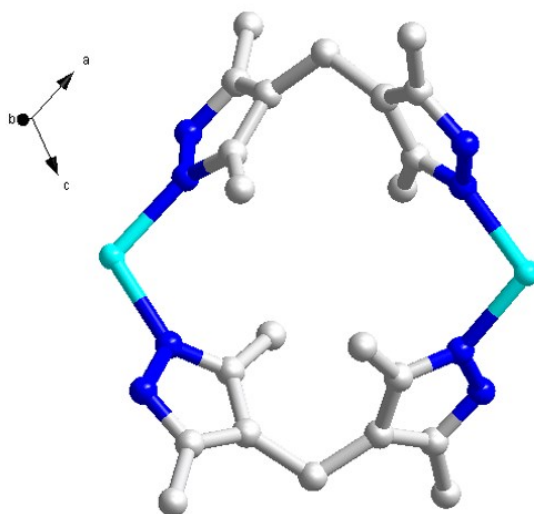

Fig. S3. The bi-nuclear cycle  $\{\text{Co}_2(\text{H}_2\text{bdpm})_2\}^{4+}$  in compound 5.

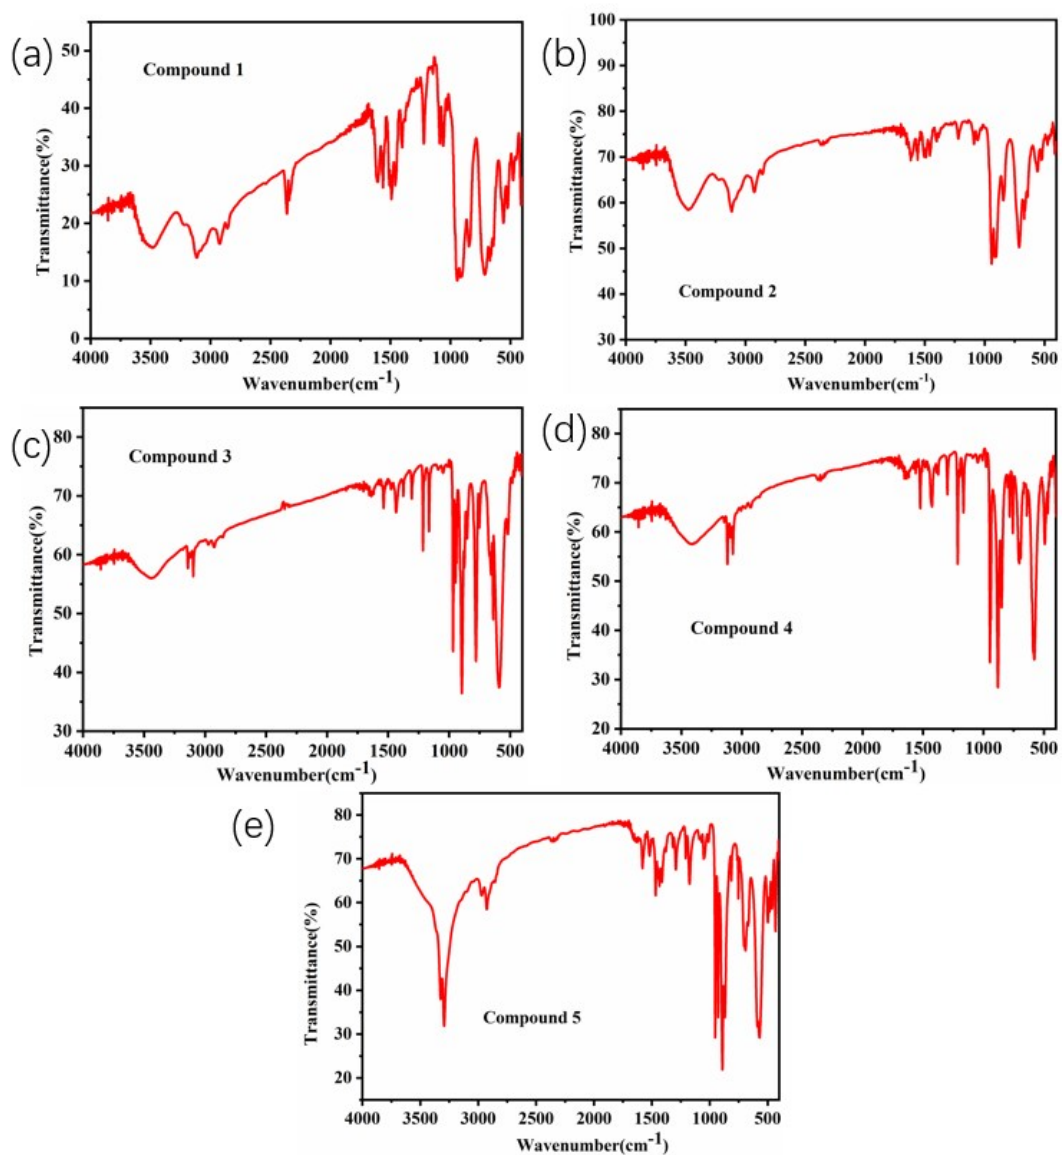

Fig. S4. The IR spectra of compounds 1–5.

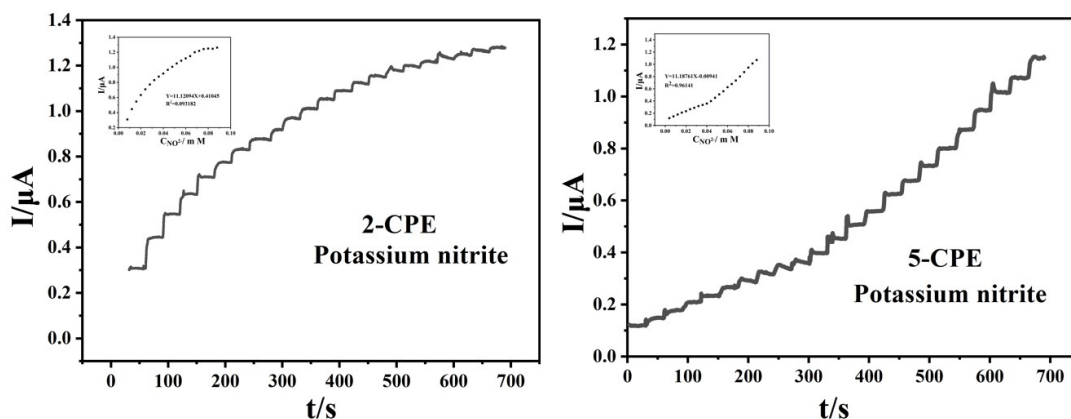

Fig. S5. Amperometric response for the 2- and 5-CPEs on successive addition of 0.1 mM  $\text{NO}_2^-$  to 0.1 M  $\text{H}_2\text{SO}_4$  + 0.5 M  $\text{Na}_2\text{SO}_4$  aqueous solution (The inset: the steady-state calibration curve for current versus  $\text{NO}_2^-$  concentration. Applied potential: 240 mV for 2-CPE and 200 mV for 5-CPE).

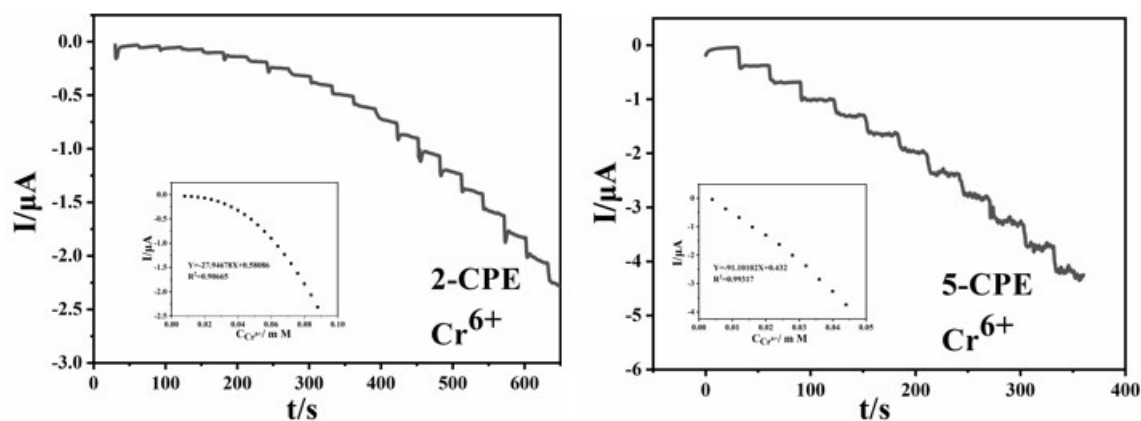

Fig. S6. Amperometric response for the 2- and 5-CPEs on successive addition of 0.1 mM  $\text{Cr}(\text{VI})$  to 0.1 M  $\text{H}_2\text{SO}_4$  + 0.5 M  $\text{Na}_2\text{SO}_4$  aqueous solution (The inset: the steady-state calibration curve for current versus  $\text{Cr}(\text{VI})$  concentration. Applied potential: 240 mV for 2-CPE and 200 mV for 5-CPE).

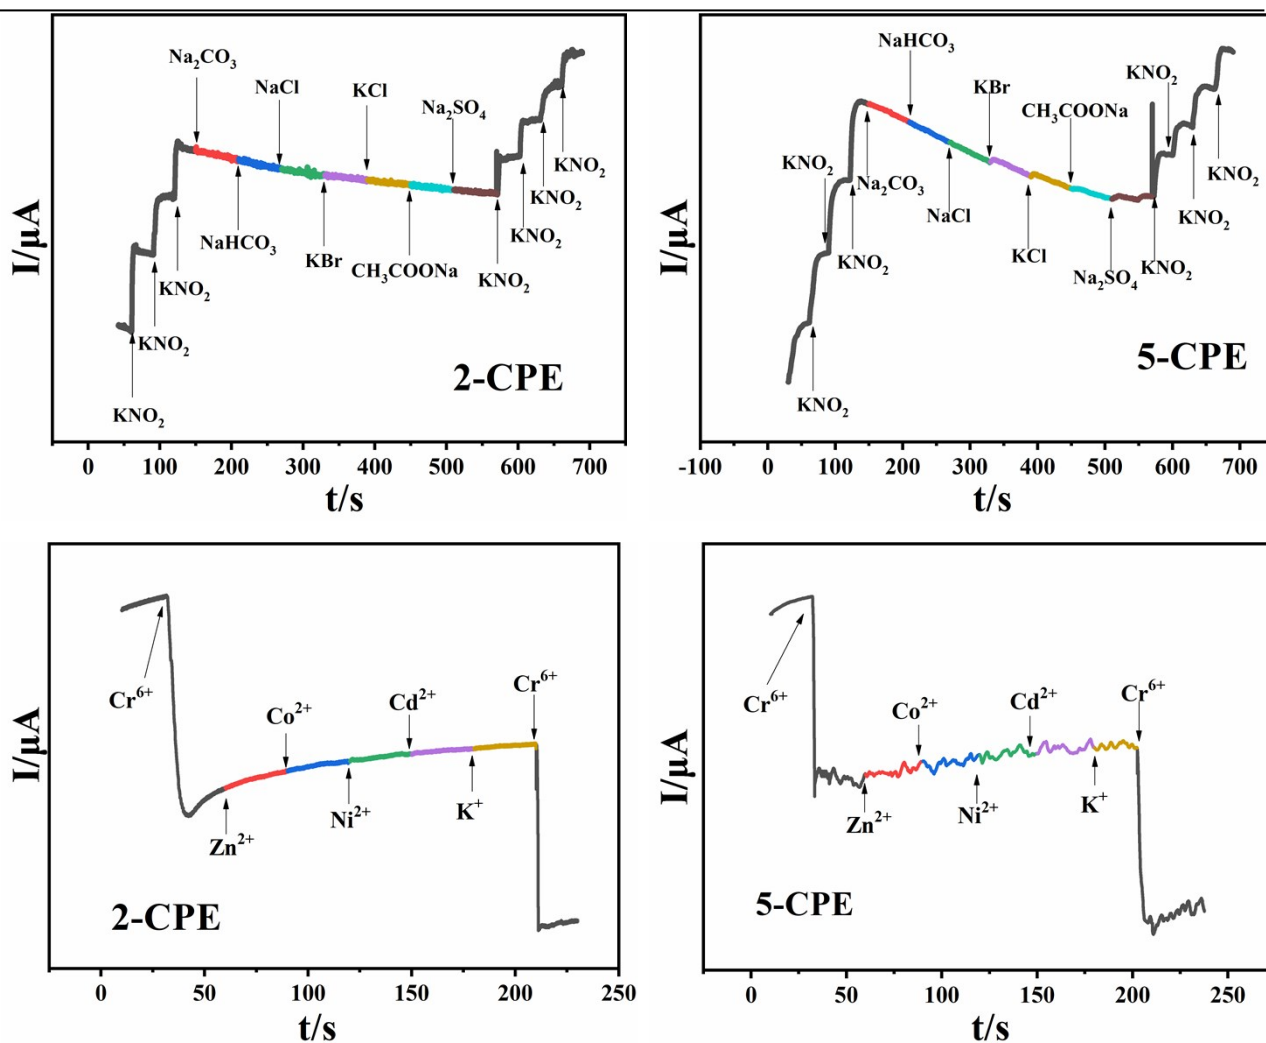

Fig. S7. Amperometric current responses of 2- and 5-CPEs to  $\text{NO}_2^-$  and  $\text{Cr}(\text{VI})$  in aqueous solution upon addition of various inorganic salts.

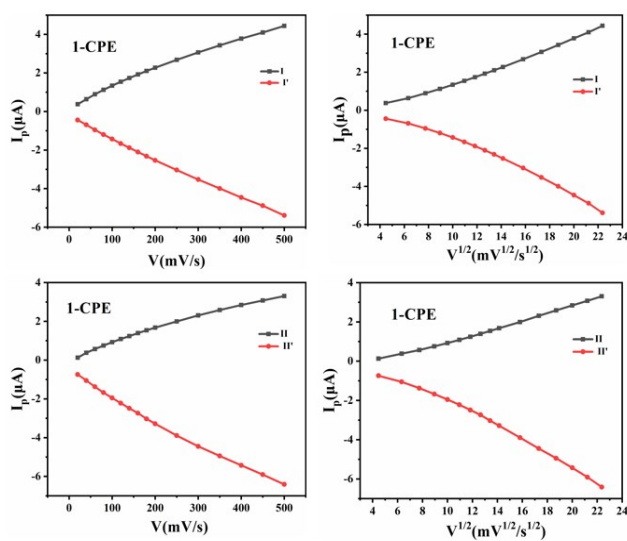

Fig. S8. Plots of the anodic and the cathodic peak I-I' and II-II' current against  $v$  and  $v^{1/2}$  of 1-CPE.

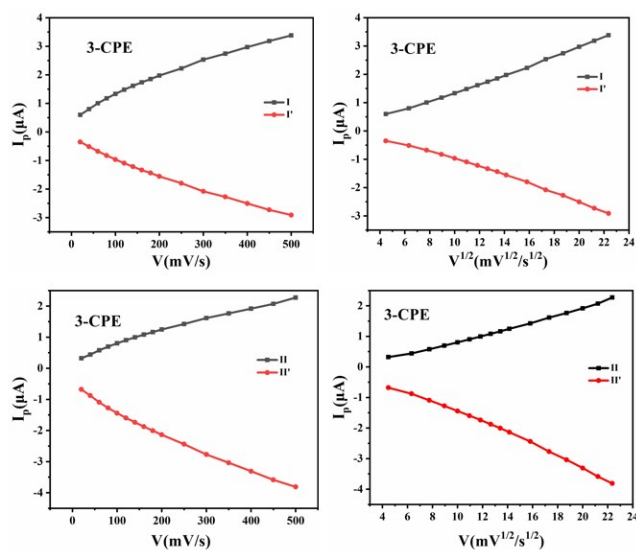

Fig. S9. Plots of the anodic and the cathodic peak I-I' and II-II' current against  $v$  and  $v^{1/2}$  of 3-CPE.

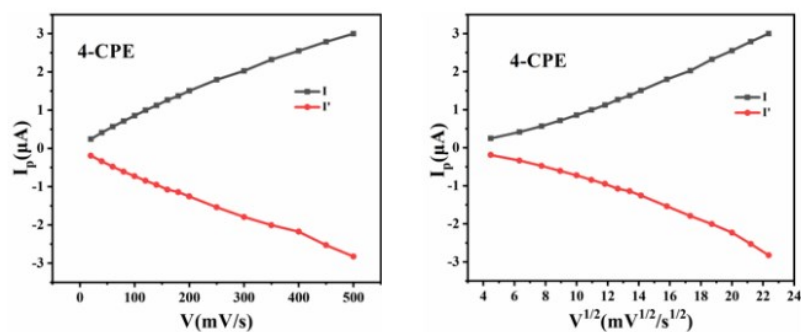

Fig. S10. Plots of the anodic and the cathodic peak I-I' current against  $v$  and  $v^{1/2}$  of 4-CPE.

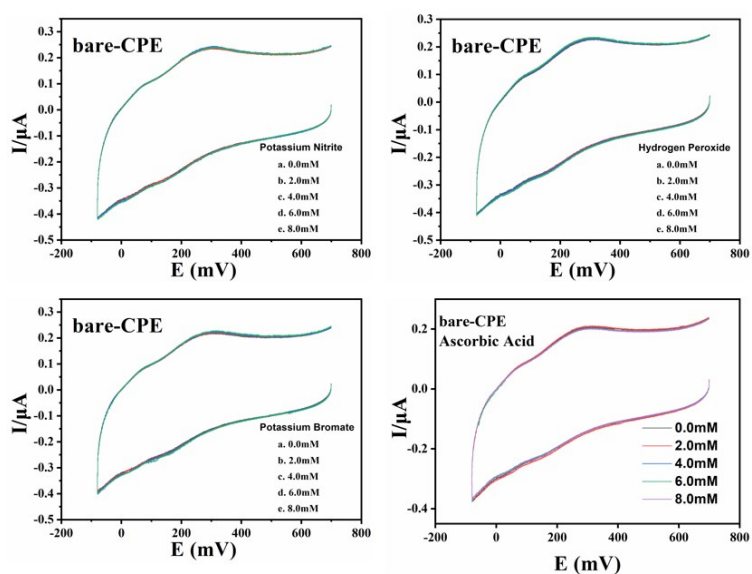

Fig. S11. Cyclic voltammograms of the bare-CPEs in 0.1 M H<sub>2</sub>SO<sub>4</sub> + 0.5 M Na<sub>2</sub>SO<sub>4</sub> aqueous solution

containing 0-8.0 mM H<sub>2</sub>O<sub>2</sub>/KNO<sub>2</sub>/KBrO<sub>3</sub>/AA. Scan rate: 250 mV·s<sup>-1</sup>.

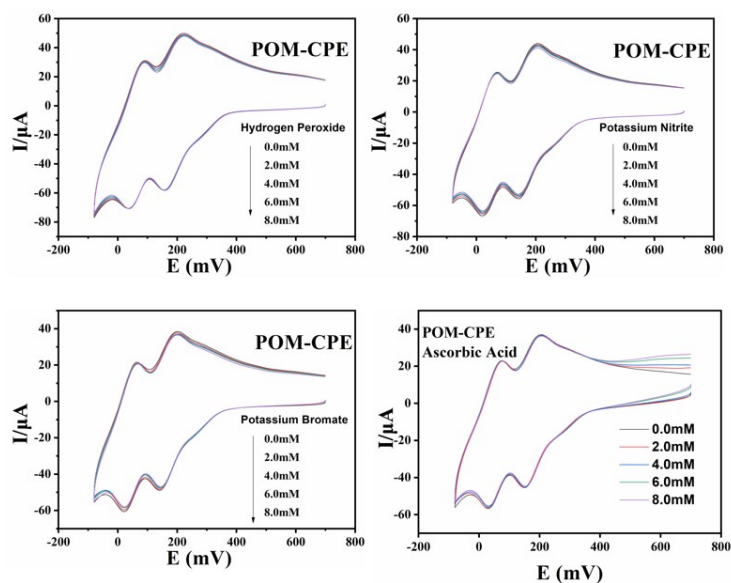

**Fig. S12.** Cyclic voltammograms of the POM-CPEs in 0.1 M H<sub>2</sub>SO<sub>4</sub> + 0.5 M Na<sub>2</sub>SO<sub>4</sub> aqueous solution containing 0-8.0 mM H<sub>2</sub>O<sub>2</sub>/KNO<sub>2</sub>/KBrO<sub>3</sub>/AA. Scan rate: 250 mV·s<sup>-1</sup>.

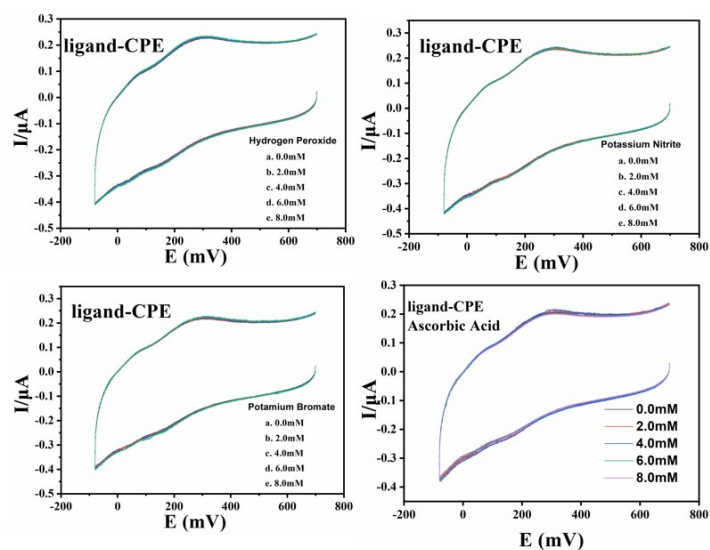

**Fig. S13.** Cyclic voltammograms of the ligand-CPEs in 0.1 M H<sub>2</sub>SO<sub>4</sub> + 0.5 M Na<sub>2</sub>SO<sub>4</sub> aqueous solution containing 0-8.0 mM H<sub>2</sub>O<sub>2</sub>/KNO<sub>2</sub>/KBrO<sub>3</sub>/AA. Scan rate: 250 mV·s<sup>-1</sup>.

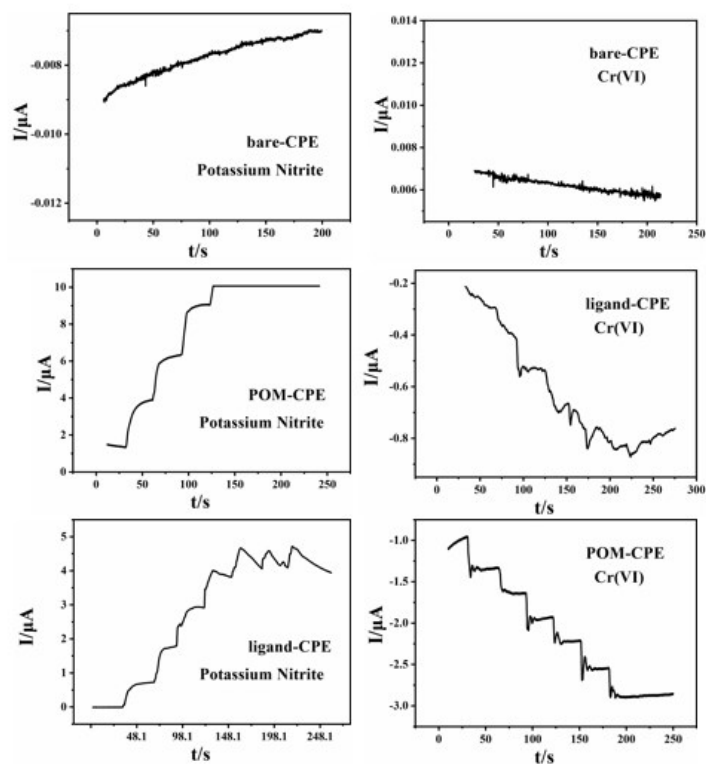

**Fig. S14.** Amperometric response for the bare, POM and ligand-CPEs on successive addition of 0.1 mM  $\text{NO}_2^-$  and  $\text{Cr}^{6+}$  to 0.1 M  $\text{H}_2\text{SO}_4$  + 0.5 M  $\text{Na}_2\text{SO}_4$  aqueous solution (Applied potential: 140 mV for bare, POM, ligand-CPEs).

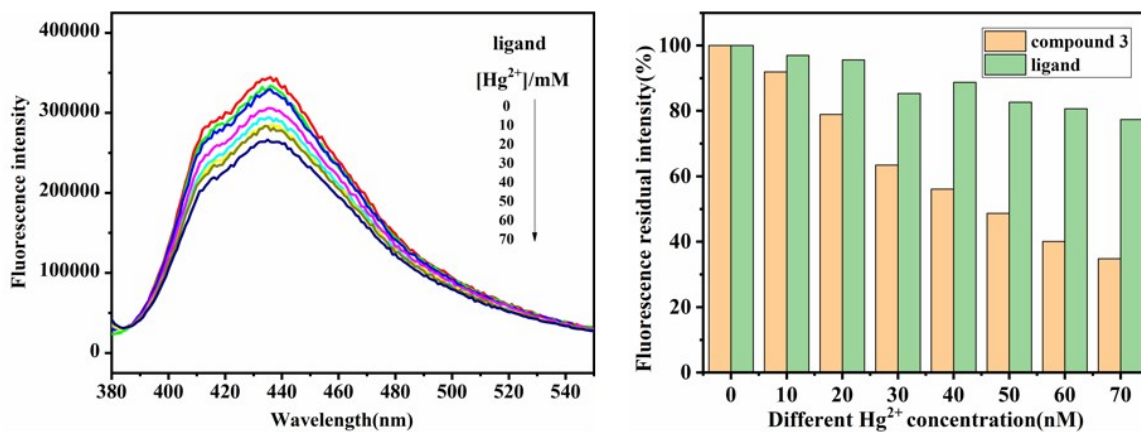

**Fig. S15.** (a) Fluorescence intensity of ligand suspension with gradually increased  $\text{Hg}^{2+}$ ; (b) Bar diagram to show fluorescence residual intensity of compound 3 and ligand suspension upon addition of different  $\text{Hg}^{2+}$  concentrations.

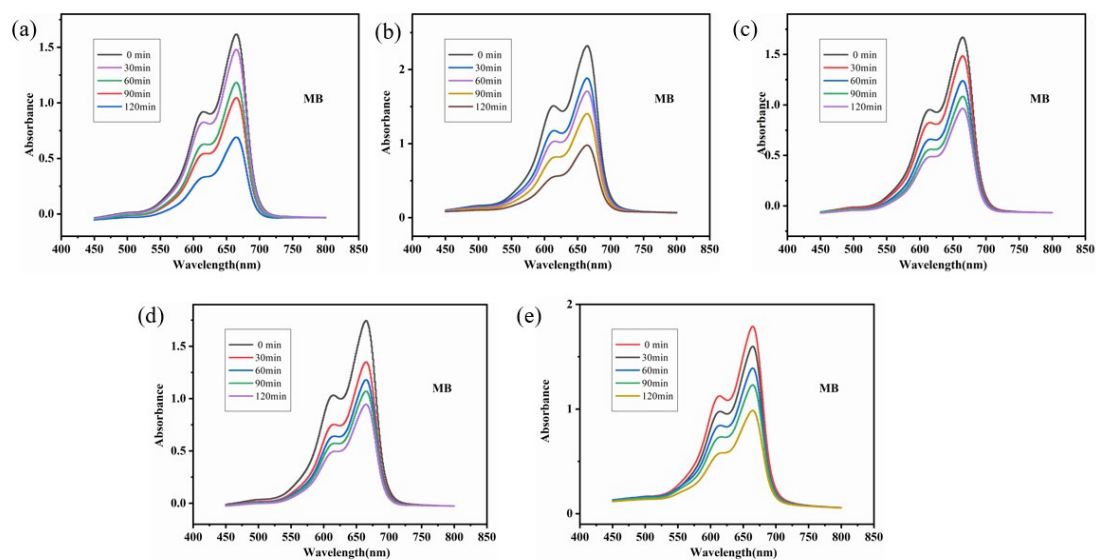

**Fig. S16.** (a)–(e) Absorption spectra of the MB solutions during the decomposition reaction under UV irradiation with the presence of compounds 1–5.

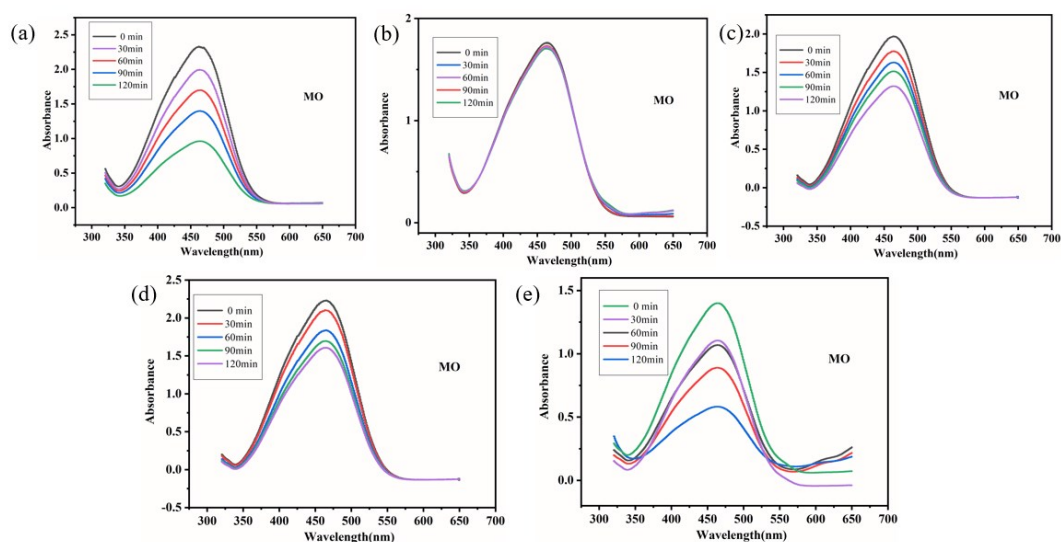

**Fig. S17.** (a)–(e) Absorption spectra of the MO solutions during the decomposition reaction under UV irradiation with the presence of compounds 1–5.



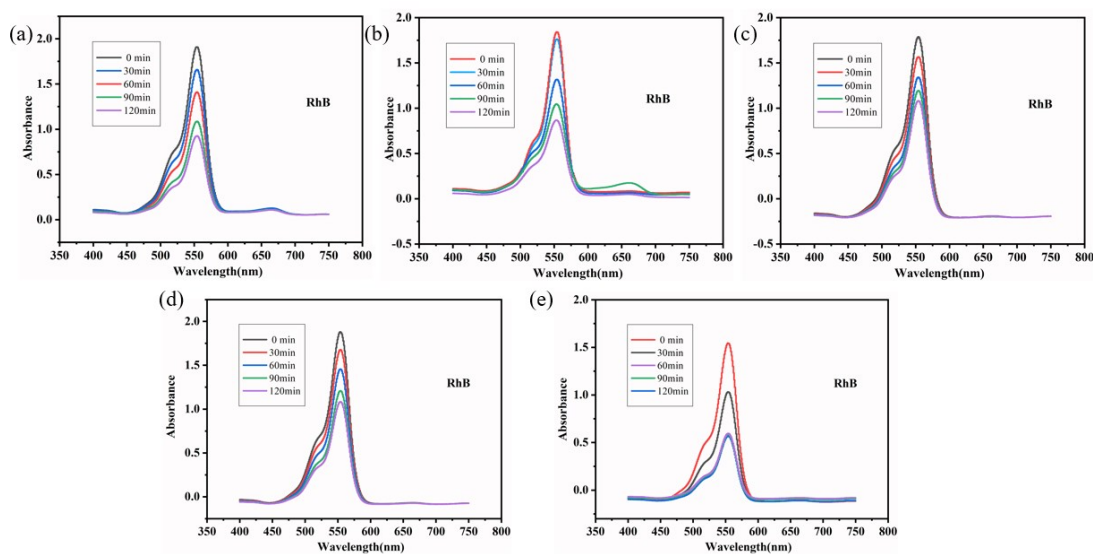

**Fig. S18.** (a)–(e) Absorption spectra of the RhB solutions during the decomposition reaction under UV irradiation with the presence of compounds **1–5**.

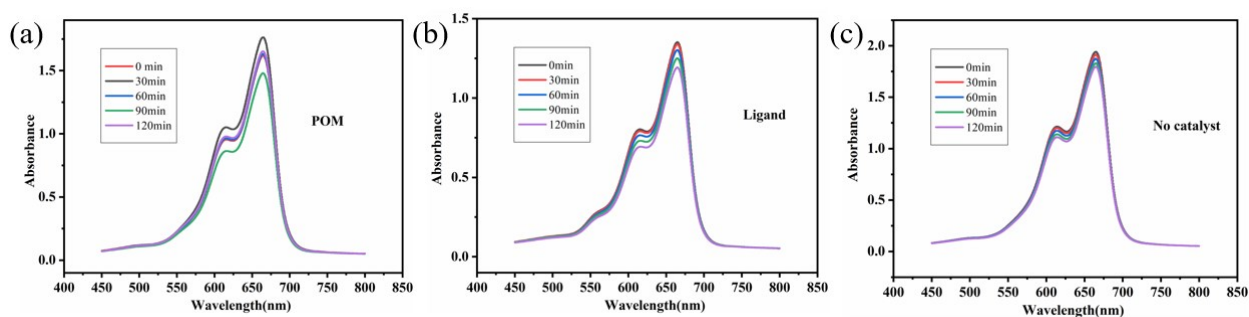

**Fig. S19.** (a)–(c) Absorption spectra of the MB solutions during the decomposition reaction under UV irradiation with POM, ligand and no catalyst.

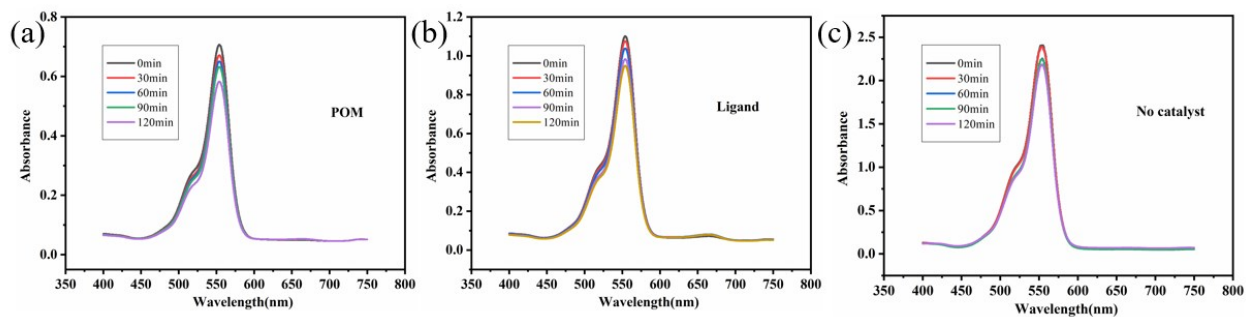

**Fig. S20.** (a)–(c) Absorption spectra of the Rhb solutions during the decomposition reaction under UV irradiation with POM, ligand and no catalyst.

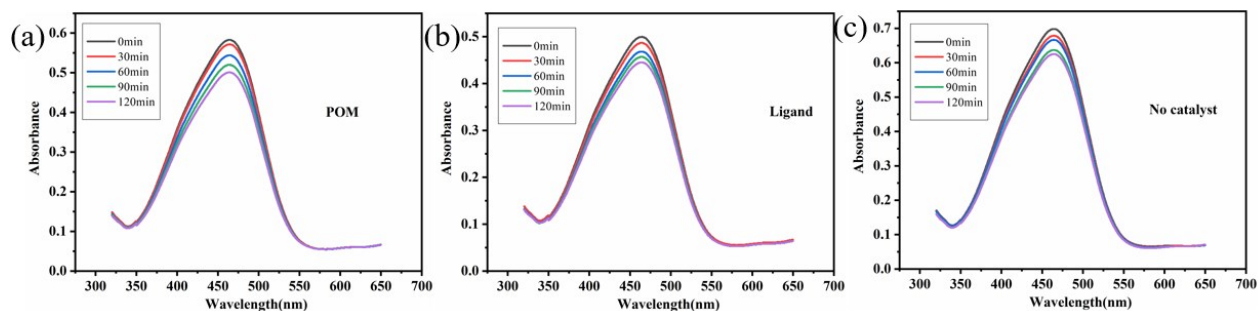

**Fig. S21.** (a)–(c) Absorption spectra of the MO solutions during the decomposition reaction under UV irradiation with POM, ligand and no catalyst.

Table S1. Selected bond distances (Å) and angles (°) for compounds 1–5.

| Compound 1        |           |                  |           |
|-------------------|-----------|------------------|-----------|
| Cu(1)-N(5)        | 1.909(15) | Cu(1)-N(10)      | 1.924(14) |
| Cu(1)-N(22)#3     | 2.029(19) | Cu(2)-N(13)      | 1.935(12) |
| Cu(2)-N(9)        | 1.924(13) | Cu(2)-N(21)#3    | 2.164(18) |
| Cu(3)-N(14)       | 1.931(12) | Cu(3)-N(1)       | 1.950(13) |
| Cu(3)-N(17)       | 2.007(11) | Cu(4)-N(2)       | 1.901(13) |
| Cu(4)-N(6)        | 1.928(14) | Cu(4)-N(18)      | 2.063(11) |
| C(11)-N(5)        | 1.28(2)   | C(22)-N(9)       | 1.31(2)   |
| C(3)-N(3)         | 1.44(2)   | C(12)-N(6)       | 1.31(2)   |
| N(19)-C(43)       | 1.38(3)   | C(4)-C(5)        | 1.48(3)   |
| N(9)-Cu(2)-N(13)  | 152.5(6)  | N(2)-Cu(4)-N(6)  | 157.7(6)  |
| N(1)-Cu(3)-N(17)  | 106.4(6)  | N(5)-Cu(1)-N(10) | 135.7(6)  |
| C(31)-N(14)-Cu(3) | 133.2(12) | N(10)-N(9)-Cu(2) | 120.4(10) |
| C(22)-N(9)-Cu(2)  | 131.6(11) | N(1)-N(2)-Cu(4)  | 122.9(10) |
| C(1)-N(2)-Cu(4)   | 132.1(12) | N(5)-N(6)-Cu(4)  | 117.4(11) |
| Compound 2        |           |                  |           |
| Cu(1)-O1W         | 1.913(5)  | Cu(1)-N(6)       | 1.990(7)  |
| C(8)-C(9)         | 1.53(2)   | Cu(2)-O1W        | 1.916(5)  |
| Cu(2)-O2W         | 1.917(5)  | Cu(2)-N(1)       | 1.979(7)  |
| Cu(2)-N(5) #4     | 1.986(7)  | Cu(3)-O2W        | 1.912(5)  |

---

|                   |           |                    |           |
|-------------------|-----------|--------------------|-----------|
| Cu(3)-N(2)        | 2.007 (7) | N(1)-C(11)         | 1.286(11) |
| C(1)-N(7)         | 1.308(12) | N(3)-C(11)         | 1.367(12) |
| N(6)-Cu(1)-O1W    | 91.9(2)   | O1W-Cu(2)-O2W      | 167.4(3)  |
| O1W-Cu(2)-N(5) #4 | 88.8(2)   | N(1)-Cu(2)-N(5) #4 | 158.4(3)  |
| O3W-Cu(3)-N(2)    | 86.0(5)   | O2W-Cu(3)-O3W      | 84.6(5)   |

**Compound 3**

|                 |           |                   |            |
|-----------------|-----------|-------------------|------------|
| Cu(1)-N(1)      | 2.015(5)  | Cu(1)-N(2)        | 1.975(4)   |
| Cu(1)-O(3)#3    | 2.264(4)  | Cu(1)-O(6)        | 1.967(4)   |
| Cu(1)-O(9)      | 1.913(3)  | S(2)-C(7)         | 1.716(6)   |
| S(2)-C(6)       | 1.704(8)  | S(1)-C(3)         | 1.701(7)   |
| S(1)-C(2)       | 1.710(6)  | N(1)-C(7)         | 1.312(7)   |
| O(9)-Cu(1)-O(6) | 87.55(18) | O(9)-Cu(1)-N(1)   | 95.23(17)  |
| O(9)-Cu(1)-N(2) | 172.7(2)  | O(6)-Cu(1)-N(1)   | 151.81(18) |
| N(2)-Cu(1)-N(1) | 83.25(19) | O(2)-Cu(1)-O(3)#3 | 89.80(18)  |

**Compound 4**

|                 |            |                 |            |
|-----------------|------------|-----------------|------------|
| Co(1)-N(1)      | 2.111(3)   | Co(1)-N(2)      | 2.101(3)   |
| Co(1)-O(3)      | 2.090(3)   | Co(1)-O(6)      | 2.142(3)   |
| Co(1)-O(2)#2    | 2.116(2)   | Co(1)-O(7)#3    | 2.239(2)   |
| S(1)-C(2)       | 1.717(4)   | S(1)-C(3)       | 1.702(5)   |
| N(2)-C(5)       | 1.392(5)   | N(2)-C(7)       | 1.318(5)   |
| N(2)-Co(1)-O(6) | 98.42(11)  | N(2)-Co(1)-N(1) | 79.20(13)  |
| N(1)-Co(1)-O(6) | 89.16(11)  | O(3)-Co(1)-N(1) | 171.45(11) |
| O(3)-Co(1)-N(2) | 104.51(12) | O(3)-Co(1)-O(6) | 82.70(10)  |

**Compound 5**

|                 |           |                   |            |
|-----------------|-----------|-------------------|------------|
| Co(1)-O(2)      | 2.086(3)  | Co(1)-O(3)        | 2.058(3)   |
| Co(1)-N(2)      | 2.057(3)  | Co(1)-O(7)#4      | 2.095(3)   |
| Co(1)-O(1)#2    | 2.254(3)  | N(2)-N(1)         | 1.361(5)   |
| N(2)-Co(1)-O(2) | 90.03(12) | N(2)-Co(1)-O(3)   | 94.55(12)  |
| O(3)-Co(1)-O(2) | 82.60(11) | O(3)-Co(1)-O(7)#4 | 160.17(11) |

---

|                                                                            |           |                 |           |
|----------------------------------------------------------------------------|-----------|-----------------|-----------|
| N(3)#5-Co(1)-O(7)#4                                                        | 95.36(12) | N(2)-Co(1)-O(3) | 94.55(12) |
| Symmetry codes: #2 -x,-y,-x; #3 1-x,1-y,-z; #4 2-x,1-y,-z ;#5 1-x,+y,1/2-z |           |                 |           |

Table. S2. Comparison of different amperometric sensors of NO<sub>2</sub><sup>-</sup>.

| Electrode material                         | Method      | Concentration range | Detection limit          | Ref.      |
|--------------------------------------------|-------------|---------------------|--------------------------|-----------|
| <b>1-CPE</b>                               | CV          | 0.008-0.08 mM       | 1.4×10 <sup>-7</sup> M   | This work |
| <b>2-CPE</b>                               | CV          | 0.008-0.088mM       | 5.6×10 <sup>-7</sup> M   | This work |
| <b>3-CPE</b>                               | CV          | 0.004-0.092 mM      | 1.135×10 <sup>-7</sup> M | This work |
| <b>4-CPE</b>                               | CV          | 0.004-0.088 mM      | 1.264×10 <sup>-6</sup> M | This work |
| <b>5-CPE</b>                               | CV          | 0.004-0.088 mM      | 4.26×10 <sup>-8</sup> M  | This work |
| <b>CR-GO/GCE</b>                           | Amperometry | 0.0089-0.167 mM     | 1.0×10 <sup>-6</sup> M   | <b>1</b>  |
| <b>RGO-MWNT</b>                            | DPV         | 0.075–6.060 mM      | 2.5×10 <sup>-5</sup> M   | <b>2</b>  |
| <b>TOBA/ZnP<sub>p</sub>-C<sub>60</sub></b> | Amperometry | 0.002-0.164 mM      | 1.44×10 <sup>-6</sup> M  | <b>3</b>  |

Table. S3. Comparison of different amperometric sensors of Cr<sup>6+</sup>.

| Electrode material | Method      | Concentration range | Detection limit        | Ref.      |
|--------------------|-------------|---------------------|------------------------|-----------|
| <b>1-CPE</b>       | Amperometry | 0.004-0.032 mM      | 7.4×10 <sup>-8</sup> M | This work |
| <b>2-CPE</b>       | Amperometry | 0.008-0.088 mM      | 2.5×10 <sup>-7</sup> M | This work |
| <b>3-CPE</b>       | Amperometry | 0.004-0.092 mM      | 6.5×10 <sup>-7</sup> M | This work |

|                                                                  |              |                 |                         |           |
|------------------------------------------------------------------|--------------|-----------------|-------------------------|-----------|
| <b>4-CPE</b>                                                     | Amperometry  | 0.004-0.032 mM  | $7.35 \times 10^{-6}$ M | This work |
| <b>5-CPE</b>                                                     | Amperometry  | 0.004-0.044 mM  | $1.03 \times 10^{-6}$ M | This work |
| <b>AuSPE</b>                                                     | CV           | 0.01-1.6 mM     | $4.4 \times 10^{-6}$ M  | <b>4</b>  |
| <b>screen-printed<br/>carbon electrode</b>                       | FIP response | 0.001-0.316 mM  | $7.7 \times 10^{-7}$ M  | <b>5</b>  |
| <b>Fe<sub>3</sub>O<sub>4</sub>/MoS<sub>2</sub><br/>composite</b> | Amperometry  | 0.0005-0.328 mM | $0.2 \times 10^{-6}$    | <b>6</b>  |

---

1. J. P. Metters, R. O. Kadara and C. E. Banks, Electroanalytical sensing of chromium(III) and (VI) utilising gold screen printed macro electrodes, *Analyst*, 2012, **137**, 896-902.
2. F. X. Hu, S. H. Chen, C. Y. Wang, R. Yuan, D. H. Yuan and C. Wang, Study on the application of reduced graphene oxide and multiwall carbon nanotubes hybrid materials for simultaneous determination of catechol hydroquinone, p-cresol and nitrite, *Analytica Chimica Acta*, 2012, **724**, 40-46.
3. Y. Zhang, P. Chen, F. F. Wen, B. Yuan and H. G. Wang, Fe<sub>3</sub>O<sub>4</sub> nanospheres on MoS<sub>2</sub> nanoflake: Electrocatalysis and detection of Cr(VI) and nitrite, *Journal of Electroanalytical Chemistry*, 2016, **761**, 14-20.
4. J. P. Metters, R. O. Kadara and C. E. Banks, Electroanalytical sensing of chromium(III) and (VI) utilising gold screen printed macro electrodes, *Analyst*, 2012, **137**, 896-902.
5. R. A. Sanchez-Moreno, M<sup>a</sup>. J. Gismera, M<sup>a</sup>. T. Sevilla and J. R. Procopio, Potentiometric Screen-Printed Bisensor for Simultaneous Determination of Chromium(III) and Chromium(VI), *Electroanalysis*, 2011, **23**, 287-294.
6. Y. Zhang, P. Chen, F. F. Wen, B. Yuan and H. G. Wang, Fe<sub>3</sub>O<sub>4</sub> nanospheres on MoS<sub>2</sub> nanoflake: Electrocatalysis and detection of Cr(VI) and nitrite, *Journal of Electroanalytical Chemistry*, 2016, **761**, 14-20.
